1 **Interspecies transmission from pigs to ferrets of antigenically distinct swine H1**  
2 **influenza A viruses with loss in reactivity to human vaccine virus antisera as**  
3 **measures of relative zoonotic risk**

4 J. Brian Kimble<sup>1#</sup>, Carine K. Souza<sup>1</sup>, Tavis K. Anderson<sup>1</sup>, Zebulun W. Arendsee<sup>1</sup>, David  
5 E. Hufnagel<sup>1</sup>, Katharine M. Young<sup>1</sup>, Nicola S. Lewis<sup>2</sup>, C. Todd Davis<sup>3</sup>, Amy L. Vincent  
6 Baker<sup>1,\*</sup>

7 <sup>1</sup>Virus Prion Research Unit, National Animal Disease Center, USDA-ARS, Ames IA.

8 <sup>2</sup>Department of Pathology and Population Sciences, Royal Veterinary College,  
9 University of London, Hertfordshire, UK.

10 <sup>3</sup>Influenza Division, National Center for Immunization and Respiratory Diseases,  
11 Centers for Disease Control and Prevention, Atlanta GA.

12

13 \*Address correspondence to Amy Vincent Baker, [amy.vincent@usda.gov](mailto:amy.vincent@usda.gov)

14 #Current address: Foreign Arthropod-borne Animal Disease Research Unit, National Bio  
15 and Agro-Defense Facility, USDA-ARS, Manhattan, KS

16

## 17 **Abstract**

18 During the last decade, endemic swine H1 influenza A viruses (IAV) from six different  
19 genetic clades of the hemagglutinin gene caused zoonotic infections in humans. The  
20 majority of zoonotic events with swine IAV were restricted to a single case with no  
21 subsequent transmission. However, repeated introduction of human-seasonal H1N1,  
22 continual reassortment between endemic swine IAV, and subsequent drift in the swine  
23 host resulted in highly diverse swine IAV with human-origin genes that may become a  
24 risk to the human population. To prepare for the potential of a future swine-origin IAV  
25 pandemic in humans, public health laboratories selected candidate vaccine viruses  
26 (CVV) for use as vaccine seed strains. To assess the pandemic risk of contemporary  
27 US swine H1N1 or H1N2 strains, we quantified the genetic diversity of swine H1 HA  
28 genes, and identified representative strains from each circulating clade. We then  
29 characterized the representative swine IAV against human seasonal vaccine and CVV  
30 strains using ferret antisera in hemagglutination inhibition assays (HI). HI assays  
31 revealed that 1A.3.3.2 (pdm) and 1B.2.1 (delta-2) demonstrated strong cross reactivity  
32 to human seasonal vaccines or CVVs. However, swine IAV from three clades that  
33 represent more than 50% of the detected swine IAVs in the USA showed significant  
34 reduction in cross-reactivity compared to the closest CVV virus: 1A.1.1.3 (alpha-  
35 deletion), 1A.3.3.3-clade 3 (gamma), and 1B.2.2.1 (delta-1a). Representative viruses  
36 from these three clades were further characterized in a pig-to-ferret transmission model  
37 and shown to exhibit variable transmission efficiency. Our data prioritize specific  
38 genotypes of swine H1N1 and H1N2 to further investigate in the risk they pose to the  
39 human population.

40

41 Keywords: influenza A virus, pandemic preparedness, zoonosis, risk assessment,  
42 variant, antigenic drift

### 43 **Importance**

44 Influenza A virus (IAV) is endemic in both humans and pigs and there is  
45 occasional bidirectional transmission of viruses. The process of interspecies  
46 transmission introduces novel viruses that increases the viral diversity in each host,  
47 impacting viral ecology and challenging control efforts through vaccine programs.  
48 Swine-origin IAVs have the potential to cause human pandemics, and pandemic  
49 preparation efforts include the identification and generation of candidate vaccine viruses  
50 (CVV) derived from epidemiologically relevant swine IAV surface proteins. The CVVs  
51 are derived from swine IAV detected and isolated in humans, and are updated  
52 infrequently; consequently the efficacy of these vaccines against contemporary swine  
53 IAV is unclear given rapid turnover and change of diversity. In this report we perform a  
54 risk assessment of contemporary swine H1 IAVs, determine whether current CVVs  
55 cross-react, and illustrate how swine-origin IAV replicate, transmit, and cause disease in  
56 a swine-to-ferret model system. In doing so, we identify the swine IAV that have lost  
57 cross-reactivity to current pandemic preparedness vaccines and demonstrate the utility  
58 of swine-to-ferret transmission experiments to further inform risk assessment.

59

## 60 **1 Introduction**

61           Influenza A viruses (IAV) infect a broad range of wild and domestic animal  
62 species and humans, and result in disease states ranging from asymptomatic to severe  
63 pneumonia and death. Wild waterfowl act as the natural reservoir for IAV, but various  
64 subtypes and lineages are endemic in domestic poultry, swine, and human populations.  
65 IAVs cause significant economic impact on swine productions systems (1-3). In the  
66 United States (US), three primary subtypes of IAV endemically circulate in swine  
67 populations with multiple hemagglutinin (HA) genetic clades present within each  
68 subtype (4). Within the H1 subtype, which accounted for approximately 68% of all IAVs  
69 isolated from US pigs in 2020, 8 HA phylogenetic clades and 9 neuraminidase (NA)  
70 clades were detected (4, 5). This considerable diversity is driven by a number of factors,  
71 including intra-species genetic evolution, reassortment, and the repeated introduction of  
72 human-origin IAV strains to pig populations (6-8). Additionally, a large diverse swine IAV  
73 population may have significant impact on human health, where swine-origin IAV may  
74 zoonotically transmit sporadically, termed “variant” in humans, or cause pandemics  
75 infecting millions of people, as seen during the 2009 H1N1 pandemic (H1N1pdm09) (9).

76           Swine H1 IAV in the US are classified by hemagglutinin (HA), and are either 1A  
77 lineage that evolved from the 1918 H1N1 pandemic, or 1B lineage that resulted from  
78 introduction and subsequent persistence of pre-2009 human seasonal H1N1 (10). The  
79 1B lineage has 3 genetic clades that are currently circulating in the US: 1B.2.1,  
80 1B.2.2.1, and 1B.2.2.2 (10). The 1A lineage viruses include 5 genetic clades that are  
81 currently circulating: 1A.1.1.3, 1A.2, 1A.2-3-like, 1A.3.3.2, and 1A.3.3.3 (10, 11). Within  
82 the 1A lineage is the H1N1pdm09, with the HA assigned the global nomenclature of

83 clade 1A.3.3.2. This clade of viruses emerged in swine, zoonotically infected humans  
84 and has since become endemic, replacing the existing seasonal H1N1 in humans (12,  
85 13). Thus, the swine-origin pandemic 1A.3.3.2 clade has gained sustained transmission,  
86 evolution, and adaptation in the human population (13). Over the years since 2009, the  
87 1A.3.3.2 human viruses were repeatedly reintroduced into swine herds (12), and have  
88 increased diversification of other swine HA clades by constantly adding human-origin  
89 internal genes to endemic swine H1 via reassortment (14). Thus, reverse-zoonoses  
90 alters and enhances viral diversity in swine, and potentially impacts the likelihood of  
91 zoonotic infection through the pairing of human-origin genes to antigenically unique  
92 swine surface proteins.

93         Since 2009, efforts increased to prepare for the next potential IAV pandemic of  
94 swine origin. Applying the lessons learned from generating the H1N1pdm09 human  
95 vaccine, a selection of variant IAV from human zoonotic isolates have been used to  
96 create candidate vaccine viruses (CVV) (15, 16). If a swine-origin variant IAV emerged  
97 in the human population, a CVV could be used as seed stock to rapidly initiate vaccine  
98 production, provided there was antigenic cross-reactivity between the novel strain and  
99 the CVV and the variant IAV. Upon initial selection and generation, CVVs typically  
100 exhibit high cross reactivity to genetically similar viruses in swine (16). However,  
101 evolution of IAV in the swine host can result in antigenic change that will reduce the  
102 efficacy of CVVs. Further, of the eight swine H1 clades currently circulating in the US,  
103 only five have an available CVV, and there is limited understanding of how well those  
104 CVVs react with the diverse array of contemporary swine viruses.

105           In a previous study, we demonstrated that swine H1 lineage strains from 2012-  
106 2019 were significantly different from human seasonal vaccine strains and this antigenic  
107 dissimilarity increased over time as the viruses evolved in swine (11, 17). Pandemic  
108 preparedness CVV strains also demonstrated a loss in similarity with tested swine  
109 strains. Human sera revealed a range of responses to swine H1 IAV, including two  
110 lineages of viruses with little to no immunity, 1A.1.1.3 and 1B.2.1 (11). In this study, to  
111 further assess these swine H1, we identified contemporary, representative swine IAVs  
112 collected from 2019-2020. Selected viruses were tested against ferret antisera as a  
113 proxy for predicting the efficacy of available seasonal vaccines and CVV against current  
114 circulating swine IAVs. Of the tested strains, three swine H1 IAVs demonstrated  
115 reduced cross-reactivity to relevant CVVs and were derived from genetic clades that are  
116 frequently detected in surveillance. These strains were used in a pig-to-ferret  
117 transmission model to assess zoonotic transmission potential. This work uses *in silico*,  
118 *in vitro*, and *in vivo* approaches and identified gaps in current pandemic preparedness  
119 vaccine strategies by identifying three swine-origin H1 IAVs of zoonotic concern with a  
120 natural host species-based risk assessment.

## 121 **2 Material and Methods**

### 122 **2.1 Genetic analysis and strain selection**

123           Human IAV vaccine composition and pandemic preparedness CVV assessments  
124 occur biannually at the WHO Vaccine Composition Meeting. In these meetings, animal  
125 influenza activity data are presented with 6-month windows along with human seasonal  
126 influenza activity data. Consequently, we downloaded all available swine HA H1  
127 sequences that were collected and/or deposited in GISAID between Jan 1, 2020 and

128 June 30, 2020 (18). These sequences were aligned alongside CVV strains and human  
129 seasonal vaccine strains with mafft v7.453 (19), and each HA gene was classified to  
130 genetic clade within the octoFLU pipeline (20); if whole genome data were available for  
131 a strain, each gene was similarly classified to evolutionary lineage to determine genome  
132 constellation. Following classification, sequences were translated to amino acid, and a  
133 consensus HA1 for each identified clade was generated using flutile  
134 (<https://github.com/flu-crew/flutile>). A pairwise distance matrix was generated in  
135 Geneious Prime, and a wildtype field strain that was the best match to the HA1 clade  
136 consensus and that was available in the USDA IAV in swine virus repository was  
137 selected for additional characterization by hemagglutinin inhibition (HI) assay. Amino  
138 acid differences between CVVs or human seasonal vaccine strains and characterized  
139 swine IAV and clade consensus HA1s were generated using flutile  
140 (<https://github.com/flu-crew/flutile>). These data were visualized through the inference of  
141 a maximum-likelihood phylogeny for the HA nucleotide alignment using IQ-TREE v2  
142 implementing automatic model selection (21). After selecting strains to represent  
143 contemporary swine H1 clades, selection criteria were expanded to include  
144 representative neuraminidase (NA) and internal gene constellations, the predominant  
145 evolutionary lineages were identified using octoFLUshow (5) and representative strains  
146 were tested against human seasonal vaccine and CVV ferret anti-sera.

## 147 **2.2 Viruses and ferret antisera**

148 Selected H1N1 and H1N2 isolates were obtained from the National Veterinary  
149 Services Laboratories (NVSL) through the U.S. Department of Agriculture (USDA) IAV  
150 swine surveillance system in conjunction with the USDA-National Animal Health

151 Laboratory Network (NAHLN). Viruses used in this study were: 1A.1.1.3 A/swine/North  
152 Carolina/A02245416/2020 (NC/20) and A/swine/Texas/A02245420/2020 (TX/20);  
153 1A.3.3.2 A/swine/Utah/A02432386/2019 (UT/19); 1A.3.3.3  
154 A/swine/Minnesota/A02245409/2020 (MN/20); 1B.2.2.1 A/swine/Iowa/A02478968/2020  
155 (IA/20); 1B.2.2.2 A/swine/Colorado/A02245414/2020; and 1B.2.1  
156 A/swine/Illinois/A02139356/2018 (IL/18). Vaccine viruses were provided by the Centers  
157 for Disease Control and Prevention (CDC), Atlanta, Georgia, USA and included  
158 1A.1.1.3. IDCDC-RG59 A/Ohio/24/2017-CVV (OH/24/17), 1A.3.3.3 A/Ohio/9/2015  
159 (OH/15), 1A.3.3.2 A/Idaho/7/2018 (ID/18), 1B.2.2.1 A/Iowa/32/2016 (IA/16), 1B.2.1  
160 A/Ohio/35/2017 (OH/35/17), and 1B.2.1 A/Michigan/383/2018 (MI/18). Viruses were  
161 grown in Madin-Darby canine kidney (MDCK) cells in Opti-MEM (Life Technologies,  
162 Waltham, MA) with 10% fetal calf serum and antibiotics/antimycotics supplemented with  
163 1g/ml tosyl phenylalanyl chloromethyl ketone (TPCK)-trypsin (Worthington Biochemical  
164 Corp., Lakewood, NJ).

165 Ferret antisera produced against candidate virus vaccine (CVV) strains were  
166 kindly provided by CDC, Atlanta, Georgia, U.S. Antisera raised in ferrets against the  
167 following viruses were used: 1A.1.1.3 IDCDC-RG59 A/Ohio/24/2017-CVV, 1A.3.3.3  
168 IDCDC-RG48 A/Ohio/9/2015-CVV, 1A.3.3.2 A/Idaho/7/2018, 1B.2.2.1 A/Iowa/32/2016,  
169 1B.2.1 A/Ohio/35/2017, and 1B.2.1 A/Michigan/383/2018.

### 170 **2.3 Hemagglutination Inhibition**

171 Ferret antisera were heat inactivated at 56°C for 30 min then treated with a 20%  
172 Kaolin suspension (Sigma-Aldrich, St.Louis, MO) followed by adsorption with 0.75%  
173 guinea pig red blood cells (gpRBC) to remove nonspecific hemagglutination inhibitors



174 as previously described (17). Treated ferret antisera were used in HI assay with  
175 gpRBCs. Briefly, 4 HAU of virus in 25ul was mixed with 25ul of two-fold serially diluted  
176 serum. After a 30-minute incubation at room temperature, 50ul of 0.75% gpRBCs were  
177 added and allowed to settle for 1 hour. Wells were observed for hemagglutination  
178 activity and the reciprocal of the highest serum dilution factor that prevented  
179 hemagglutination was recorded as the HI titer.

## 180 **2.4 Swine-to-ferret transmission study design**

181 Twenty 3-week-old piglets of mixed sex were obtained from an IAV- and porcine  
182 reproductive and respiratory syndrome virus-free herd. Prophylactic antibiotics (Excede;  
183 Zoetis, Florham Park, NJ) were administered upon arrival to prevent potential  
184 respiratory bacterial infections. Sixteen 4–6-month-old male and female ferrets were  
185 obtained from an influenza-free high health source. Animals were housed under BSL2  
186 containment in compliance with the USDA-ARS NADC institutional animal care and use  
187 committee. Serum was collected from each pig and ferret and screened by a  
188 commercial enzyme-linked immunosorbent assay (ELISA) (MultiS ELISA; Idexx,  
189 Westbrook, ME) prior to experimental manipulations to confirm all animals were free of  
190 prior immunity and maternally acquired IAV specific antibodies. Pigs were divided  
191 randomly into groups of 5 and placed into separate containment rooms. Three groups  
192 received 2ml of IAV inoculum at  $1 \times 10^6$  TCID<sub>50</sub> via intranasal administration. At two  
193 days post inoculation (dpi) four ferrets were placed in the room in separate, open-  
194 fronted isolators placed approximately 4 feet from pig decking (22). All animals received  
195 a subcutaneous radio frequency microchip (pigs: Deston Fearing, Dallas, TX; Ferrets:  
196 Biomedic Data Systems Inc., Seaford, DE) for identification and body temperature

197 monitoring purposes. Body temperature and weight (ferrets only) were recorded from -3  
198 to 14 dpi, with the readings recorded prior to exposure used for establishing a baseline  
199 reading. Ferrets were provided routine care and handled before pigs, with a change in  
200 outer gloves and decontamination of equipment with 70% ethanol between individual  
201 ferrets.

202 Three pigs from each experimental group were euthanized at 5dpi and  
203 necropsied to evaluate lung lesions and collect broncho-alveolar lavage fluid (BALF)  
204 (23). All pigs were nasal swabbed at 0, 1, 3, and 5 dpi as previously described. The  
205 remaining pigs were swabbed on 7 and 9 dpi and euthanized at 14dpi. Blood samples  
206 were collected prior to exposure and at necropsy for all pigs.

207 Contact ferrets were sampled by nasal wash collection at 0, 1, 3, 5, 7, 9, 11 and  
208 12-days post contact (dpc) (22). BALF samples from ferrets were collected at necropsy  
209 (12 dpc) (22). Blood samples were collected prior to exposure and at 12 dpc to test for  
210 seroconversion by HI assays and (17, 24) by a commercial NP-ELISA (MultiS ELISA;  
211 Idexx, Westbrook, ME).

## 212 **2.5 Virus replication and shedding**

213 Nasal samples and BALF samples were titrated on MDCK cells to evaluate virus  
214 replication in the nose and lungs, as previously described (23). Inoculated monolayers  
215 were evaluated for cytopathic effect (CPE) between 48 and 72 h post-infection, and  
216 positive wells were identified by testing supernatant via hemagglutination assay with  
217 turkey RBC. A TCID<sub>50</sub>/ml titer was calculated for each sample using the method  
218 described by Reed and Muench (25).

## 219 **2.6 Pathology examination**

220 Swine lungs were evaluated for lesions at 5 dpi following standard protocols to  
221 assess pathogenesis in swine and potential for transmission to ferrets (23). The  
222 percentage of the lung affected with pneumonic consolidation typical of influenza virus  
223 in ferrets was visually estimated at 12 dpc to assess resolution of disease following  
224 transmission, following methods of scoring previously described (22). Tissue samples  
225 from the trachea and right middle or affected lung lobe were fixed in 10% buffered  
226 formalin for histopathologic examination. Tissues were processed by routine  
227 histopathologic procedures and slides stained with hematoxylin and eosin (H&E) or  
228 stained by immunohistochemistry.

## 229 **2.7 Microbiological assays**

230 Swine BALF samples were cultured for aerobic bacteria on blood agar and  
231 Casmin (NAD-enriched) plates to indicate the presence of concurrent bacterial  
232 pneumonia. To exclude other causes of pneumonia in pigs, PCR assays were  
233 conducted for porcine circovirus 2 (PCV2) (26), and for *Mycoplasma hyopneumoniae*  
234 and North American and European PRRSV (VetMax; Life Technologies, Carlsbad, CA)  
235 according to the manufacturer's recommendations.

## 236 **3 Results**

### 237 **3.1. Genetic and phylogenetic characterization of US swine H1 hemagglutinin**

238 Between January 1 2020 and June 30 2020, 342 swine IAV isolates with an H1  
239 HA were identified. These viruses represented 8 genetic clades across two evolutionary  
240 lineages: 1A.1.1.3 (n=36, 10.6%), 1A.2 (n=3, 0.9%), 1A.2-3-like (n=3, 0.9%), 1A.3.3.2  
241 (n=53, 15.5%), 1A.3.3.3 (n=145, 42.4%), 1B.2.1 (n=80, 23.4%), 1B.2.2.1 (n=15, 4.4%),

242 1B.2.2.2 (n=7, 2%) (Figure 1). For each detected H1 clade, HA1 amino acid sequences  
243 were aligned, a consensus sequence generated, and a wildtype virus with highest HA1  
244 similarity to consensus was selected to represent the clade (Table 1). The percent  
245 amino acid identity of selected strains ranged from 96.63-99.39% when compared to  
246 matching within-clade consensus and ranged from 90.83-98.16% when compared to  
247 within-clade CVVs (Table 1). The number of amino acid differences between the  
248 representative HA gene and the within-clade CVV or human seasonal vaccine ranged  
249 from 6 to 29 amino acid differences (Supplemental Tables 1-6).

### 250 **3.2 Dominant U.S. swine H1 strains drifted from human seasonal H1 or CVV**

251 In addition to current human seasonal vaccines, CVV strains were selected and  
252 generated by WHO collaborating centers to mitigate a future potential outbreak of swine  
253 IAV in humans. Ferret antisera generated against human vaccine and CVV strains and  
254 other variant IAV viruses were tested by HI to determine the relative cross-reactivity to  
255 contemporary swine viruses. Within the 1A lineage of HA genes, there were 2 CVVs  
256 and the human seasonal H1pdm vaccine strain that correspond to the 1A1.1, 1A.3.3.3  
257 and 1A.3.3.2 clades, respectively (Table 2). The consensus 1A1.1 contemporary  
258 representative virus, NC/20, had an HI titer of 80 against CVV OH/24/17 antiserum  
259 compared to the homologous OH/24/17 titer of 1280, representing a 16-fold reduction in  
260 cross-reactivity. Similarly, the 1A.3.3.3 contemporary representative MN/20 virus  
261 displayed a 32-fold reduction in HI activity compared to homologous 1A.3.3.3 CVV  
262 OH/15. Conversely, the 1A.3.3.2 selected virus, UT/19, had had no loss in HI titer as  
263 compared to the homologous ID/18 (A/Brisbane/02/2018 (H1N1)-like) human strain.

264           The 1B lineage of HA genes also had three antisera generated against variant  
265 viruses used to generate CVVs: 1B.2.2.1 IA/16 and 1B.2.1 OH/35/17 and MI/18. The  
266 1B.2.2.1 virus, IA/20, had an 8-fold reduction in cross-reactivity compared to the  
267 1B.2.2.1 CVV IA/16 virus. There is no clade-specific CVV for the 1B.2.2.2 clade of  
268 swine viruses and the representative virus, CO/20 had limited reactivity to all potential  
269 vaccine sera. Finally, the 1B.2.1 virus, IL/18, was antigenically very similar (2-fold or  
270 less reduction) to both 1B.2.1 CVV antisera.

### 271 **3.3 Swine-to-ferret transmission**

272           The antigenic data indicated the three clades of swine IAV with lowest reactivity to  
273 vaccine antisera: 1A.1.1.3, 1A.3.3.3, and 1B.2.2.1. These 3 clades accounted for 54.2%  
274 of H1 subtype IAV swine isolates during 2020 (5). Therefore, viruses from 1A.1.1.3,  
275 1A.3.3.3, and 1B.2.2.1 clades were selected to test the zoonotic potential using a pig-to-  
276 ferret interspecies transmission model. While antigenicity is primarily driven by genetic  
277 factors within the HA1 domain of the HA gene, zoonosis is affected by viral factors  
278 attributed throughout the genome. To address this, we expanded our selection criteria  
279 to include NA and internal gene constellations (n = 225 H1N1 and H1N2 whole genome  
280 sequences collected in 2020: Supplemental Figure 1). During 2020, the 1B.2.2.1 HA  
281 gene was primarily paired with a N2-2002B gene with a TTTTPT internal gene  
282 constellation; the 1A.3.3.3 HA gene was primarily paired with a N1-Classical gene with  
283 a TTTPPT internal gene constellation. The 1A.3.3.3 (A/Minnesota/A02245409/2020)  
284 and 1B.2.2.1 (A/swine/Iowa/A02478968/2020) viruses selected for the antigenic  
285 characterization matched the predominant circulating NA and dominant internal gene  
286 constellations and thus remained unchanged. For the 1A.1.1.3 HA clade, the primary

287 NA pairing in 2020 was a N2-2002A gene with detections of TTTTPT, TTTPPT,  
288 TTPTPT, and TTPPPT. The NC/20 virus used for HI assays did not match the  
289 predominant N2-NA gene, and had a TTTPPT internal gene constellation, and  
290 consequently, the strain selected for subsequent *in vivo* studies was  
291 A/swine/Texas/A02245420/2020 (TX/20) that had a N2-2002A gene with a TTTTPT  
292 internal gene constellation.

293 All three selected viruses had similar shedding patterns in pigs in terms of peak and  
294 duration (Figure 2). Evaluation of samples collected at the 5dpi necropsy revealed  
295 similar levels of macroscopic pathology between the 1A.1.1.3 (alpha) and the 1B.2.2.1  
296 (delta-1a) groups at 2.4 and 2.3 percent of affected lung surface respectively. These  
297 two groups had a mean BALF titer of  $3.6 \times 10^5$  TCID<sub>50</sub>/ml and  $5.9 \times 10^6$  TCID<sub>50</sub>/ml  
298 respectively. The 1A.3.3.3 (gamma) virus had higher average percentage of lung  
299 lesions (8.1%) and higher BALF titers ( $1.8 \times 10^7$  TCID<sub>50</sub>/ml) than the other groups. All 6  
300 remaining pigs seroconverted at 14dpi with an average HI titer of 905, 640, and 80 in  
301 1A.1.1.3, 1A.3.3.3, and 1B.2.2.1, respectively. These data demonstrated the propensity  
302 for the pigs to seed the room with aerosolized virus to expose the ferrets.

303 The three viruses displayed different levels of transmissibility to contact ferrets  
304 (Figure 3). All four 1A.1.1.3 contact ferrets shed virus with an average of 2.3 positive  
305 sample days and an average peak titer of  $7.9 \times 10^5$  TCID<sub>50</sub>/ml in nasal washes. All four  
306 ferrets seroconverted with a geometric mean HI titer of 679 at 12dpc. The four 1A.3.3.3  
307 contact ferrets all seroconverted as well, but with a lower geometric mean titer (231)  
308 and only two of the four ferrets had recoverable viral loads in the nasal washes with an  
309 average of 2.5 positive sample days and an average peak titer of  $5.38 \times 10^5$  in nasal

310 washes. In contrast, only one of four 1B.2.2.1 contact ferrets seroconverted (HI=160)  
311 and had 2 nasal wash positive sample days with a peak titer of  $8.9 \times 10^4$  TCID<sub>50</sub>/ml. No  
312 ferret had recoverable viral loads in the BALF samples collected at 12dpc.

313 Minimal signs of disease were observed in the ferrets. Daily temperature  
314 measurements revealed minimal elevation in temperatures and no differences among or  
315 between treatment groups. Body weight monitoring revealed if a ferret shed virus,  
316 regardless of group, it gained significantly less weight ( $3.5 \pm 2.9\%$ ) compared to ferrets  
317 that did not shed virus ( $10.9 \pm 6.5\%$ ) (Table 4), but there were no significant differences  
318 in change in body weight between virus groups. Necropsy on 12dpc revealed minimal  
319 gross pathology, with only two ferrets, one 1A.1.1.3 (4.6%) and one 1B.2.2.1 (3.5%),  
320 demonstrating visible lung lesions. No lesions were observed in any 1A.3.3.3 exposed  
321 ferrets at 12dpc (Table 4).

## 322 Discussion

323 Animal origin influenza A viruses (IAV) from avian or swine are a documented  
324 source of human IAV zoonotic infections, epidemics, and pandemics. The four most  
325 recent IAV pandemics were all driven by either direct zoonosis or by reassortment and  
326 zoonosis (9, 27). Regional epidemics and smaller outbreaks were also initiated by the  
327 spillover of avian and swine viruses into human populations  
328 (<https://www.cdc.gov/flu/weekly/fluviewinteractive.htm>). In addition to the 2009  
329 pandemic, swine-origin IAV are also responsible for annual human infections, termed  
330 variants, ranging from single cases up to outbreaks of several hundred. Much progress  
331 has been made in preparing for future animal origin IAV pandemics, with the most

332 proactive efforts centered on the generation of CVV from human cases of IAV of animal  
333 origin, including variant viruses of swine origin. These stockpiled CVVs would be used  
334 as seed viruses for rapid vaccine generation should an antigenically similar animal  
335 origin virus initiate a human pandemic.

336 Swine IAV in the US is very diverse. In 2020 there were 14 antigenically distinct  
337 HA clades isolated from US swine herds, 8 of which were of the H1 subtype (4, 5).  
338 Contemporary clade consensus HA1 sequences can have as little as 70% amino acid  
339 similarity to divergent HA1 between swine H1 clades and within-clade HA1 sequences  
340 can be as much as 15% different (Table 1). This high level of within and between clade  
341 genetic diversity makes achieving and maintaining high levels of vaccine coverage  
342 difficult and necessitates the continued evaluation of CVV antisera reactivity against  
343 contemporary swine IAV isolates.

344 Of the 8 circulating swine H1 clades, five have existing seasonal or CVV vaccine  
345 options, including the 1A.3.3.2 component of human seasonal flu vaccine (15). Greater  
346 than 95% of 2020 US swine IAV isolates fall within those 5 human vaccine-covered  
347 clades (4, 5). Contemporary, clade-representative viruses of two of these clades  
348 showed high levels of cross-reactivity to existing vaccines, 1A.3.3.2 and 1B.2.1 (Table 2  
349 & 3). Cross-species events involving human-to-swine infection of 1A.3.3.2 viruses in  
350 pigs are common in the US (6, 12). This continuous influx of human viruses makes it  
351 unsurprising that a representative swine 1A.3.3.2 virus had high levels of cross  
352 reactivity with a human 1A.3.3.2 vaccine. The 1B.2.1 A/Michigan/383/2018 is the most  
353 recently generated CVV. As such, it follows that the 1B.2.1 clade had not antigenically  
354 drifted and high levels of cross-reactivity were expected and observed. Three swine IAV



355 clades have no within-clade vaccine or CVV available: 1A.2, 1A.4, and 1B.2.2.2.  
356 Additionally, these three clades had limited cross-reactivity to inter-clade CVVs.  
357 However, these three clades only represented 4.5% of 2020 US swine IAV isolates.  
358 This relative scarcity may minimize the opportunities for zoonotic transmissions and  
359 reduced the priority for assessing their pandemic risk posed to humans at this time.  
360 However, relative detection frequency of swine HA clades changes over time and these  
361 clades may need to be reassessed in the future given frequent interstate movement of  
362 pigs and viruses (28-31). Contemporary clade representative isolates from 1A.1.1.3 (16-  
363 fold reduction), 1A.3.3.3 (32-fold reduction) and 1B.2.2.1 (8-fold reduction) exhibited  
364 high levels of antigenic drift from relevant CVVs and these three H1 swine clades  
365 represented 54.2% of 2020 US swine IAV isolates (5). These clades have high  
366 frequency of detection in US swine herds and have reduced vaccine reactivity to human  
367 CVV, indicating a higher potential pandemic risk and requiring further examination of  
368 transmission risk factors. The 1A.1.1.3 and 1B.2.2.1 swine H1 clades also showed low  
369 detection by human population sera in a previous study (11). H3 clades represented  
370 32% of all IAV in swine detected in 2020 (n=346 of 1093,(5)), but these H3 will be  
371 assessed in a separate publication.

372 To address zoonotic potential, these viruses were used in a swine-to-ferret  
373 interspecies transmission study. While all three viruses exhibited some level of  
374 interspecies transmission, they did so with varying efficiency (Figure 3). The 1A.1.1.3  
375 virus had complete transmission from pigs to ferrets indicated by all ferrets shedding  
376 virus and seroconverting. All four of the 1A.3.3.3 exposed ferrets also seroconverted,  
377 albeit with a lower average HI titer compared to the 1A.1.1.3, but only two of the four

378 ferrets shed virus. Finally, one 1B.2.2.1 ferret seroconverted and shed virus while the  
379 other three remained naïve, indicating a reduced propensity for interspecies  
380 transmission. The infected ferrets displayed signs of disease measured as a cessation  
381 of weight gain compared to noninfected ferrets, but no other overt signs and  
382 postmortem evaluation of the lungs revealed minimal pathological damage at 12pc  
383 (Table 4). Since this study was focused on transmission rather than pathogenesis in  
384 ferrets, further work to determine lung pathology during the active infection phase would  
385 be necessary. Nasal titers over the time course and lung titers on 5 dpi in pigs were  
386 similar for all three viruses, indicating that infection and replication kinetics in pigs did  
387 not affect transmission to ferrets. The virus and host factors contributing to the lower  
388 nasal shedding of the 1A.3.3.3 and the lower transmission of the 1B.2.2.1 swine strains  
389 in the contact ferrets are currently unknown, but potentially associated with the diverse  
390 gene segment combinations and evolutionary origins of the three viruses.

391         Results of this study indicate that swine IAV from the US may escape vaccine  
392 immunity from CVV or seasonal vaccines as they continue to circulate and evolve in the  
393 swine population. Three H1 clades demonstrated antigenic drift away from available  
394 CVV antisera. Additionally, contemporary clade representatives showed the ability to  
395 transmit from pigs to ferrets, a gold standard for human influenza transmissibility. These  
396 data highlight the increased risk to human populations posed by H1 clades of swine  
397 IAV, particularly the 1A.1.1.3. Since the conclusion of these experiments in July 2020,  
398 there have been 15 H1 variant cases in North America where the HA clade could be  
399 determined; an additional 3 variants had insufficient data to identify the HA clade. Of  
400 these variant IAVs, 2 came from the 1A.1.1.3 clade, 4 were derived from the 1A.3.3.3

401 clade, 5 were from the 1A.3.3.2 clade, and 4 were from the 1B.2.1 clade. These data  
402 highlight the utility of swine-to-ferret transmission studies as a pandemic risk  
403 assessment tool and identifies the gaps in CVV coverage of US H1 swine IAV. The  
404 results stress the need to continually assess the intra-clade cross-reactivity of existing  
405 CVVs to identify and develop more contemporarily relevant pandemic preparedness  
406 strains.

## 407 **Acknowledgments**

408 We gratefully acknowledge pork producers, swine veterinarians, and laboratories  
409 for participating in the USDA Influenza A Virus in Swine Surveillance System and  
410 publicly sharing sequences. We also gratefully acknowledge all data contributors, i.e.,  
411 the Authors and their Originating laboratories responsible for obtaining the specimens,  
412 and their Submitting laboratories for generating the genetic sequence and metadata and  
413 sharing via the GISAID Initiative, on which components of this research is based. This  
414 work was supported in part by: the U.S. Department of Agriculture (USDA) Agricultural  
415 Research Service [ARS project number 5030-32000-231-000-D]; the National Institute  
416 of Allergy and Infectious Diseases, National Institutes of Health, Department of Health  
417 and Human Services [contract numbers HHSN272201400008C and 75N93021C00015];  
418 the USDA Agricultural Research Service Research Participation Program of the Oak  
419 Ridge Institute for Science and Education (ORISE) through an interagency agreement  
420 between the U.S. Department of Energy (DOE) and USDA Agricultural Research  
421 Service [contract number DE-AC05- 06OR23100]; and the SCINet project of the USDA  
422 Agricultural Research Service [ARS project number 0500-00093-001-00-D]. The  
423 funders had no role in study design, data collection and interpretation, or the decision to

424 submit the work for publication. Mention of trade names or commercial products in this  
425 article is solely for the purpose of providing specific information and does not imply  
426 recommendation or endorsement by the USDA, CDC, DOE, or ORISE. USDA and CDC  
427 are equal opportunity providers and employers. The findings and conclusions in this  
428 report are those of the authors and do not necessarily represent the views of the  
429 Centers for Disease Control and Prevention or the Agency for Toxic Substances and  
430 Disease Registry.

### 431 **References**

- 432 1. Lambert LC, Fauci AS. 2010. Influenza vaccines for the future. *N Engl J Med* 363:2036-  
433 44.
- 434 2. Girard MP, Cherian T, Pervikov Y, Kieny MP. 2005. A review of vaccine research and  
435 development: human acute respiratory infections. *Vaccine* 23:5708-24.
- 436 3. Centers for Disease C, Prevention. 2010. Estimates of deaths associated with seasonal  
437 influenza --- United States, 1976-2007. *MMWR Morb Mortal Wkly Rep* 59:1057-62.
- 438 4. Zeller MA, Anderson TK, Walia RW, Vincent AL, Gauger PC. 2018. ISU FLUture: a  
439 veterinary diagnostic laboratory web-based platform to monitor the temporal genetic  
440 patterns of Influenza A virus in swine. *BMC Bioinformatics* 19:397.
- 441 5. Arendsee ZW, Chang J, Hufnagel DE, Markin A, Janas-Martindale A, Vincent AL,  
442 Anderson TK. 2021. octoFLUshow: an Interactive Tool Describing Spatial and Temporal  
443 Trends in the Genetic Diversity of Influenza A Virus in U.S. Swine. *Microbiol Resour*  
444 *Announc* 10:e0108121.
- 445 6. Nelson MI, Vincent AL. 2015. Reverse zoonosis of influenza to swine: new perspectives  
446 on the human-animal interface. *Trends Microbiol* 23:142-53.
- 447 7. Vijaykrishna D, Smith GJ, Pybus OG, Zhu H, Bhatt S, Poon LL, Riley S, Bahl J, Ma SK,  
448 Cheung CL, Perera RA, Chen H, Shortridge KF, Webby RJ, Webster RG, Guan Y, Peiris  
449 JS. 2011. Long-term evolution and transmission dynamics of swine influenza A virus.  
450 *Nature* 473:519-22.
- 451 8. Rajao DS, Gauger PC, Anderson TK, Lewis NS, Abente EJ, Killian ML, Perez DR,  
452 Sutton TC, Zhang J, Vincent AL. 2015. Novel Reassortant Human-Like H3N2 and H3N1  
453 Influenza A Viruses Detected in Pigs Are Virulent and Antigenically Distinct from Swine  
454 Viruses Endemic to the United States. *J Virol* 89:11213-22.
- 455 9. Neumann G, Noda T, Kawaoka Y. 2009. Emergence and pandemic potential of swine-  
456 origin H1N1 influenza virus. *Nature* 459:931-9.
- 457 10. Anderson TK, Macken CA, Lewis NS, Scheuermann RH, Van Reeth K, Brown IH,  
458 Swenson SL, Simon G, Saito T, Berhane Y, Ciacci-Zanella J, Pereda A, Davis CT, Donis  
459 RO, Webby RJ, Vincent AL. 2016. A Phylogeny-Based Global Nomenclature System  
460 and Automated Annotation Tool for H1 Hemagglutinin Genes from Swine Influenza A  
461 Viruses. *mSphere* 1.

- 462 11. Venkatesh D, Anderson TK, Kimble JB, Chang J, Lopes S, Souza CK, Pekosz A, Shaw-  
463 Saliba K, Rothman RE, Chen K-F. 2022. Antigenic characterization and pandemic risk  
464 assessment of North American H1 influenza A viruses circulating in swine. bioRxiv.  
465 12. Nelson MI, Stratton J, Killian ML, Janas-Martindale A, Vincent AL. 2015. Continual  
466 Reintroduction of Human Pandemic H1N1 Influenza A Viruses into Swine in the United  
467 States, 2009 to 2014. *J Virol* 89:6218-26.  
468 13. Su YCF, Bahl J, Joseph U, Butt KM, Peck HA, Koay ESC, Oon LLE, Barr IG,  
469 Vijaykrishna D, Smith GJD. 2015. Phylodynamics of H1N1/2009 influenza reveals the  
470 transition from host adaptation to immune-driven selection. *Nat Commun* 6:7952.  
471 14. Vijaykrishna D, Poon LL, Zhu HC, Ma SK, Li OT, Cheung CL, Smith GJ, Peiris JS, Guan  
472 Y. 2010. Reassortment of pandemic H1N1/2009 influenza A virus in swine. *Science*  
473 328:1529.  
474 15. WHO. 2020. Summary of status of development and availability of variant influenza  
475 A(H1) candidate vaccine viruses and potency testing reagents.  
476 [https://www.who.int/influenza/vaccines/virus/candidates\\_reagents/summary\\_a\\_h1v\\_cvv](https://www.who.int/influenza/vaccines/virus/candidates_reagents/summary_a_h1v_cvv_sh2021_20200930.pdf?ua=1)  
477 [\\_sh2021\\_20200930.pdf?ua=1](https://www.who.int/influenza/vaccines/virus/candidates_reagents/summary_a_h1v_cvv_sh2021_20200930.pdf?ua=1).  
478 16. Robertson JS, Nicolson C, Harvey R, Johnson R, Major D, Guilfoyle K, Roseby S,  
479 Newman R, Collin R, Wallis C, Engelhardt OG, Wood JM, Le J, Manojkumar R, Pokorny  
480 BA, Silverman J, Devis R, Bucher D, Verity E, Agius C, Camuglia S, Ong C, Rockman S,  
481 Curtis A, Schoofs P, Zoueva O, Xie H, Li X, Lin Z, Ye Z, Chen LM, O'Neill E, Balish A,  
482 Lipatov AS, Guo Z, Isakova I, Davis CT, Rivaller P, Gustin KM, Belser JA, Maines TR,  
483 Tumpey TM, Xu X, Katz JM, Klimov A, Cox NJ, Donis RO. 2011. The development of  
484 vaccine viruses against pandemic A(H1N1) influenza. *Vaccine* 29:1836-43.  
485 17. Anderson TK, Chang J, Arendsee ZW, Venkatesh D, Souza CK, Kimble JB, Lewis NS,  
486 Davis CT, Vincent AL. 2020. Swine Influenza A Viruses and the Tangled Relationship  
487 with Humans. *Cold Spring Harb Perspect Med* doi:10.1101/cshperspect.a038737.  
488 18. Shu Y, McCauley J. 2017. GISAID: Global initiative on sharing all influenza data - from  
489 vision to reality. *Euro Surveill* 22.  
490 19. Katoh K, Standley DM. 2013. MAFFT multiple sequence alignment software version 7:  
491 improvements in performance and usability. *Molecular biology and evolution* 30:772-780.  
492 20. Chang J, Anderson TK, Zeller MA, Gauger PC, Vincent AL. 2019. octoFLU: Automated  
493 Classification for the Evolutionary Origin of Influenza A Virus Gene Sequences Detected  
494 in US Swine. *Microbiology resource announcements* 8:e00673-19.  
495 21. Minh BQ, Schmidt HA, Chernomor O, Schrempf D, Woodhams MD, von Haeseler A,  
496 Lanfear R. 2020. IQ-TREE 2: New Models and Efficient Methods for Phylogenetic  
497 Inference in the Genomic Era. *Mol Biol Evol* 37:1530-1534.  
498 22. Kaplan BS, Kimble JB, Chang J, Anderson TK, Gauger PC, Janas-Martindale A, Killian  
499 ML, Bowman AS, Vincent AL. 2020. Aerosol Transmission from Infected Swine to  
500 Ferrets of an H3N2 Virus Collected from an Agricultural Fair and Associated with Human  
501 Variant Infections. *J Virol* 94.  
502 23. Gauger PC, Vincent AL, Loving CL, Henningson JN, Lager KM, Janke BH, Kehrl ME,  
503 Jr., Roth JA. 2012. Kinetics of lung lesion development and pro-inflammatory cytokine  
504 response in pigs with vaccine-associated enhanced respiratory disease induced by  
505 challenge with pandemic (2009) A/H1N1 influenza virus. *Vet Pathol* 49:900-12.  
506 24. Lin YP, Gregory V, Collins P, Kloess J, Wharton S, Cattle N, Lackenby A, Daniels R,  
507 Hay A. 2010. Neuraminidase receptor binding variants of human influenza A(H3N2)  
508 viruses resulting from substitution of aspartic acid 151 in the catalytic site: a role in virus  
509 attachment? *J Virol* 84:6769-81.  
510 25. REED LJ, MUENCH H. 1938. A SIMPLE METHOD OF ESTIMATING FIFTY PER CENT  
511 ENDPOINTS. *American Journal of Epidemiology* 27:493-497.

- 512 26. Opriessnig T, Yu S, Gallup JM, Evans RB, Fenaux M, Pallares F, Thacker EL, Brockus  
513 CW, Ackermann MR, Thomas P, Meng XJ, Halbur PG. 2003. Effect of vaccination with  
514 selective bacterins on conventional pigs infected with type 2 porcine circovirus. *Vet*  
515 *Pathol* 40:521-9.
- 516 27. Kilbourne ED. 2006. Influenza pandemics of the 20th century. *Emerg Infect Dis* 12:9-14.
- 517 28. Nelson MI, Lemey P, Tan Y, Vincent A, Lam TT-Y, Detmer S, Viboud C, Suchard MA,  
518 Rambaut A, Holmes EC. 2011. Spatial dynamics of human-origin H1 influenza A virus in  
519 North American swine. *PLoS pathogens* 7:e1002077.
- 520 29. Neveau MN, Zeller MA, Kaplan BS, Souza CK, Gauger PC, Vincent AL, Anderson TK,  
521 Lowen AC. Genetic and Antigenic Characterization of an Expanding H3 Influenza A  
522 Virus Clade in U.S. Swine Visualized by Nextstrain. *mSphere* 0:e00994-21.
- 523 30. Zeller MA, Chang J, Vincent AL, Gauger PC, Anderson TK. 2021. Spatial and temporal  
524 coevolution of N2 neuraminidase and H1 and H3 hemagglutinin genes of influenza A  
525 virus in US swine. *Virus Evol* 7:veab090.
- 526 31. Trovao NS, Nelson MI. 2020. When Pigs Fly: Pandemic influenza enters the 21st  
527 century. *PLoS Pathog* 16:e1008259.

528

529 **Table 1.** Pairwise amino acid sequence similarity of the HA1 domain from swine H1 clade consensus sequences to  
530 candidate vaccine viruses or seasonal vaccine virus and the swine hemagglutinin clade representative viruses used in this  
531 study. Within-clade comparisons are highlighted in grey.

|                        | 1A.1.1.3 Cons | A/OH/ 24/2017 CVW | A/sw/NC/ A02245416/ 2020 | A/sw/TX/ A02245420/ 2020 | 1A.3.3.2 Cons | A/ID/07/2018 | A/sw/UT/ A02432386/ 2019 | 1A.3.3.3 Cons | A/OH/ 9/2015CW | A/sw/MN/ A02245409/ 2020 | 1B.2.1 Cons | A/OH/ 35/2017 CVW | A/MI/383/ 2018 | A/sw/IL/ A02139356/2018 | 1B.2.2.1 Cons | A/IA/ 32/2016 CVW | A/sw/IA/ A02478968/ 2020 | 1B.2.2.2 Cons | A/sw/CO/ A02245414/2020 |
|------------------------|---------------|-------------------|--------------------------|--------------------------|---------------|--------------|--------------------------|---------------|----------------|--------------------------|-------------|-------------------|----------------|-------------------------|---------------|-------------------|--------------------------|---------------|-------------------------|
| 1A.1.1.3 consensus     | 98.77         | 98.77             | 95.08                    | 82.57                    | 82.57         | 82.28        | 81.35                    | 82.57         | 80.43          | 70.86                    | 70.86       | 70.86             | 71.47          | 71.78                   | 71.47         | 71.47             | 71.78                    | 70.25         |                         |
| A/OH/24/2017           | 98.77         | 97.54             | 94.46                    | 83.49                    | 83.49         | 82.89        | 81.96                    | 83.49         | 81.04          | 71.47                    | 71.17       | 71.47             | 72.09          | 72.39                   | 72.09         | 72.09             | 72.09                    | 70.55         |                         |
| A/sw/NC/A02245416/2020 | 98.77         | 97.54             | 93.85                    | 81.35                    | 81.35         | 81.05        | 80.12                    | 81.35         | 79.21          | 69.63                    | 69.63       | 69.63             | 70.25          | 70.55                   | 70.25         | 70.25             | 70.55                    | 69.63         |                         |
| A/sw/TX/A02245420/2020 | 95.08         | 94.46             | 93.85                    | 81.35                    | 81.35         | 81.36        | 79.82                    | 81.35         | 78.90          | 69.33                    | 69.33       | 69.63             | 69.94          | 70.86                   | 70.55         | 70.55             | 70.55                    | 69.02         |                         |
| 1A.3.3.2 consensus     | 82.57         | 83.49             | 81.35                    | 81.35                    | 99.69         | 97.26        | 87.77                    | 86.85         | 86.54          | 70.03                    | 70.34       | 70.64             | 70.64          | 70.95                   | 70.03         | 70.64             | 70.95                    | 69.42         |                         |
| A/ID/07/2018           | 82.57         | 83.49             | 81.35                    | 81.35                    | 99.69         | 97.57        | 88.07                    | 87.16         | 86.85          | 70.03                    | 70.34       | 70.64             | 70.64          | 70.95                   | 70.03         | 70.64             | 70.95                    | 69.42         |                         |
| A/sw/UT/A02432386/2019 | 82.28         | 82.89             | 81.05                    | 81.36                    | 97.26         | 97.57        | 88.70                    | 86.56         | 87.48          | 70.35                    | 70.66       | 70.96             | 70.96          | 71.27                   | 70.35         | 70.96             | 70.66                    | 69.13         |                         |
| 1A.3.3.3 consensus     | 81.35         | 81.96             | 80.12                    | 79.82                    | 87.77         | 88.07        | 88.70                    | 91.44         | 98.78          | 71.56                    | 71.56       | 71.56             | 72.17          | 71.87                   | 71.25         | 71.56             | 72.78                    | 71.87         |                         |
| A/OH/9/2015            | 82.57         | 83.49             | 81.35                    | 81.35                    | 86.85         | 87.16        | 86.56                    | 91.44         | 90.83          | 70.34                    | 69.42       | 70.95             | 70.64          | 70.34                   | 69.73         | 70.34             | 70.64                    | 69.11         |                         |
| A/sw/MN/A02245409/2020 | 80.43         | 81.04             | 79.21                    | 78.90                    | 86.54         | 86.85        | 87.48                    | 98.78         | 90.83          | 71.56                    | 71.87       | 71.56             | 71.87          | 72.17                   | 71.56         | 71.87             | 73.09                    | 72.17         |                         |
| 1B.2.1 Consensus       | 70.86         | 71.47             | 69.63                    | 69.33                    | 70.03         | 70.03        | 70.35                    | 71.56         | 70.34          | 71.56                    | 93.56       | 98.77             | 99.39          | 85.58                   | 84.97         | 85.58             | 86.50                    | 84.05         |                         |
| A/OH/35/2017           | 70.86         | 71.17             | 69.63                    | 69.33                    | 70.34         | 70.34        | 70.66                    | 71.56         | 69.42          | 71.87                    | 93.56       | 93.25             | 93.56          | 85.89                   | 85.58         | 85.28             | 85.58                    | 84.05         |                         |
| A/MI/383/2018          | 70.86         | 71.47             | 69.63                    | 69.63                    | 70.64         | 70.64        | 70.96                    | 71.56         | 70.95          | 71.56                    | 98.77       | 93.25             | 98.16          | 85.89                   | 85.28         | 85.89             | 86.20                    | 83.74         |                         |
| A/sw/IL/A02139356/2018 | 71.47         | 72.09             | 70.25                    | 69.94                    | 70.64         | 70.64        | 70.96                    | 72.17         | 70.64          | 71.87                    | 99.39       | 93.56             | 98.16          | 86.20                   | 85.58         | 86.20             | 87.12                    | 84.66         |                         |
| 1B.2.2.1 consensus     | 71.78         | 72.39             | 70.55                    | 70.86                    | 70.95         | 70.95        | 71.27                    | 71.87         | 70.34          | 72.17                    | 85.58       | 85.89             | 85.89          | 86.20                   | 98.47         | 98.16             | 91.72                    | 88.65         |                         |
| A/IA/32/2016           | 71.47         | 72.09             | 70.25                    | 70.55                    | 70.03         | 70.03        | 70.35                    | 71.25         | 69.73          | 71.56                    | 84.97       | 85.58             | 85.28          | 85.58                   | 98.47         | 96.63             | 91.72                    | 88.65         |                         |
| A/sw/IA/A02478968/2020 | 71.47         | 72.09             | 70.25                    | 70.55                    | 70.64         | 70.64        | 70.96                    | 71.56         | 70.34          | 71.87                    | 85.58       | 85.28             | 85.89          | 86.20                   | 98.16         | 96.63             | 90.49                    | 87.42         |                         |
| 1B.2.2.2 consensus     | 71.78         | 72.09             | 70.55                    | 70.55                    | 70.95         | 70.95        | 70.66                    | 72.78         | 70.64          | 73.09                    | 86.50       | 85.58             | 86.20          | 87.12                   | 91.72         | 91.72             | 90.49                    | 96.63         |                         |
| A/sw/CO/A02245414/2020 | 70.25         | 70.55             | 69.63                    | 69.02                    | 69.42         | 69.42        | 69.13                    | 71.87         | 69.11          | 72.17                    | 84.05       | 84.05             | 83.74          | 84.66                   | 88.65         | 88.65             | 87.42                    | 96.63         |                         |

533 **Table 2.** Antigenic cross-reactivity of 1A viruses and within-clade CVVs. Ferret antisera  
 534 raised against CVV and vaccine viruses were tested for the ability to inhibit  
 535 hemagglutination of contemporary swine viruses. Vaccine strains and homologous titers  
 536 are bolded; grey highlighted cells indicate the within clade titer of contemporary swine  
 537 strain.

| Strain                                | Lineage         | IDCDC-RG59 A/Ohio/24/2017-CVV | IDCDC-RG48 A/Ohio/9/2015-CVV | A/Idaho/7/2018* |
|---------------------------------------|-----------------|-------------------------------|------------------------------|-----------------|
| <b>A/Ohio/24/2017</b>                 | <b>1A.1.1.3</b> | <b>1280</b>                   | <10                          | 640             |
| A/swine/North Carolina/A02245416/2020 | 1A.1.1.3        | 80                            | <10                          | <10             |
| A/swine/Oklahoma/A02245237/2019       | 1A.2            | 20                            | 320                          | 640             |
| <b>A/Ohio/9/2015</b>                  | <b>1A.3.3.3</b> | <10                           | <b>2560</b>                  | <10             |
| A/swine/Minnesota/102245409/2020      | 1A.3.3.3        | <10                           | 80                           | 40              |
| <b>A/Idaho/7/2018*</b>                | <b>1A.3.3.2</b> | <10                           | <10                          | <b>1280</b>     |
| A/swine/Utah/A02432386/2019           | 1A.3.3.2        | 40                            | 160                          | 2560            |

538 \*A/Brisbane/02/2018 (H1N1)-like.

539



540 **Table 3.** Antigenic cross-reactivity of 1B viruses and intra-clade CVVs. Ferret antisera  
541 raised against candidate vaccine viruses were tested for the ability to inhibit  
542 hemagglutinin of contemporary swine viruses. Vaccine strains and homologous titers  
543 are bolded; grey highlighted cells indicate the within-clade titer of contemporary swine  
544 strains.

---

| <b>Strain</b>                   | <b>Lineage</b> | <b>A/Iowa/32/2016</b> | <b>A/Ohio/5/2017</b> | <b>A/Michigan/383/2018</b> |
|---------------------------------|----------------|-----------------------|----------------------|----------------------------|
| <b>A/Iowa/32/2016</b>           | 1B.2.2.1       | <b>640</b>            | 20                   | 10                         |
| A/swine/Iowa/A02478968/2020     | 1B.2.2.1       | 80                    | 10                   | 40                         |
| A/swine/Colorado/A02245414/2020 | 1B.2.2.2       | 40                    | 10                   | 10                         |
| <b>A/Ohio/35/2017</b>           | 1B.2.1         | 80                    | <b>640</b>           | 40                         |
| <b>A/Michigan/383/2018</b>      | 1B.2.1         | 40                    | 160                  | <b>1280</b>                |
| A/swine/Illinois/A02139356/2018 | 1B.2.1         | 20                    | 320                  | 1280                       |

545

546

547 **Table 4.** Cumulative clinical, viral, and serological measures of ferret infection.

| 1        | Ferret # | Change in bodyweight (%) from 0-12 DPC | DPC with nasal shedding | Peak nasal titer* | 12 DPC HI titer |
|----------|----------|----------------------------------------|-------------------------|-------------------|-----------------|
| 1A.1.1.3 | 1        | 4.61                                   | 5,7                     | 5.45              | 160             |
|          | 2        | 1.19                                   | 3,5,7                   | 5.94              | 1280            |
|          | 3        | 4.89                                   | 3,5,7                   | 5.94              | 1280            |
|          | 4        | 7.71                                   | 5                       | 6.2               | 1280            |
| 1A.3.3.3 | 5        | 21.36                                  | none                    | none              | 80              |
|          | 6        | 16.83                                  | none                    | none              | 160             |
|          | 7        | 2.40                                   | 5,7                     | 5.87              | 320             |
|          | 8        | -1.13                                  | 3,5,7                   | 5.53              | 1280            |
| 1B.2.2.1 | 9        | 6.74                                   | none                    | none              | <10             |
|          | 10       | 9.84                                   | none                    | none              | <10             |
|          | 11       | 5.02                                   | 5,7                     | 4.95              | 160             |
|          | 12       | 12.01                                  | none                    | none              | <10             |
| No virus | 13       | 7.25                                   | none                    | none              | <10             |
|          | 14       | 2.35                                   | none                    | none              | <10             |

548 \*Log<sub>10</sub> TCID<sub>50</sub>/ml

549

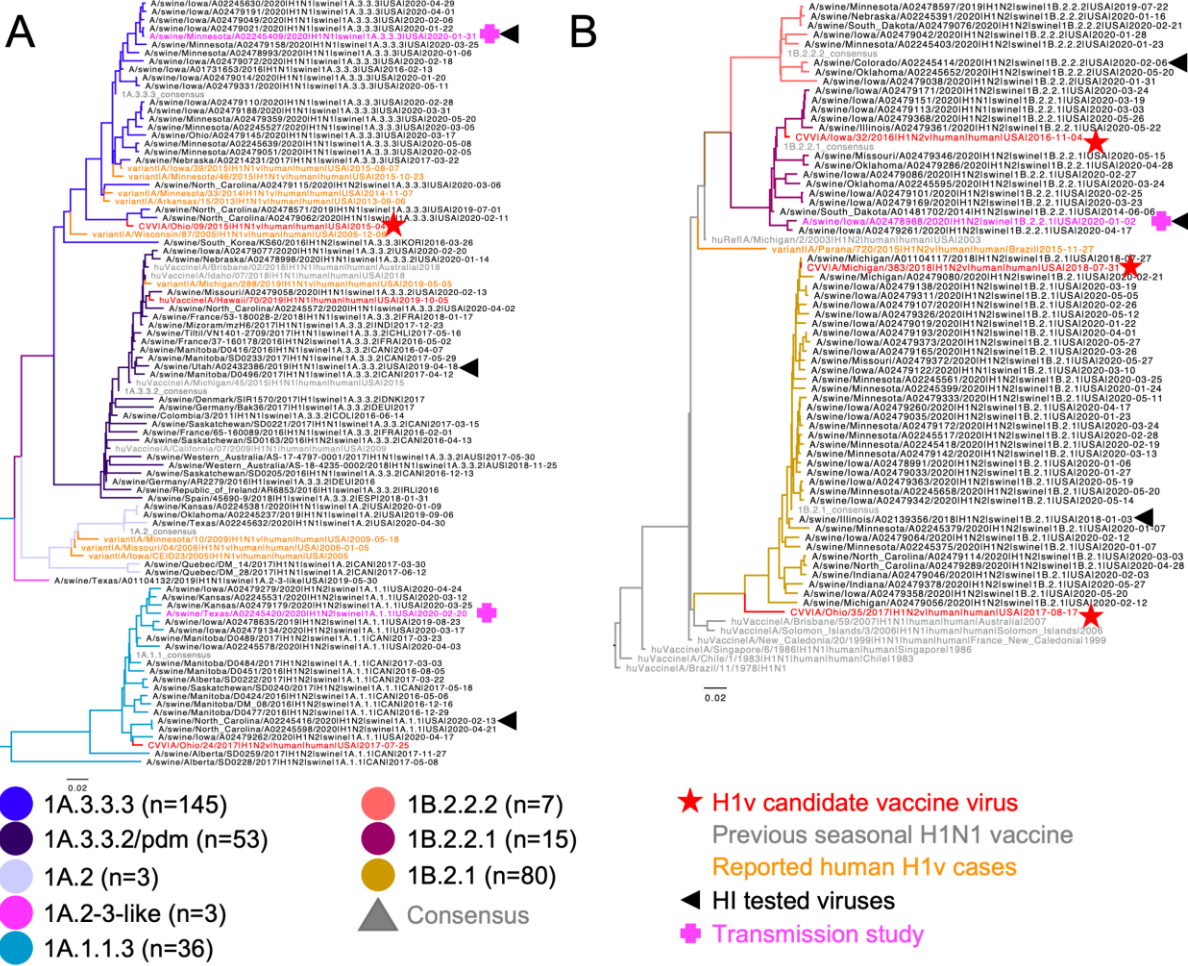

550

551 **Figure 1. Phylogenetic relationships of North American swine H1 IAV. A**

552 representative random sample of (A) 1A classical swine lineage and (B) 1B human-like

553 lineage swine HA genes from January 2020 through June 2020. Reference human HA

554 genes, candidate vaccine viruses (CVV), and variant cases are indicated by branch

555 color or shapes. Swine IAV strains tested in hemagglutination inhibition assays are

556 marked by a black triangle and those used in transmission studies by a pink plus (+).

557 The numbers in parentheses indicate number of each genetic clade detected during the

558 sampling period.

559

560

561

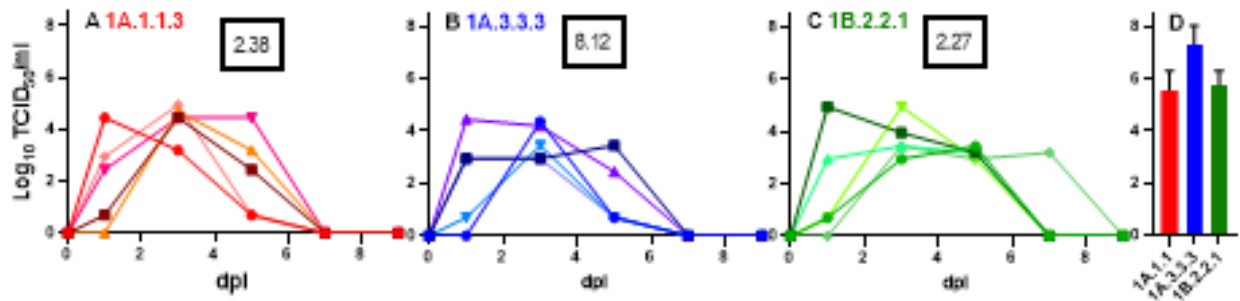

562

563 **Figure 2. Shedding and replication of clade representative viruses in pigs.**

564 Individual pig nasal samples (A-C) and group mean bronchioalveolar lavage fluid

565 (BALF) (D) viral load shown as TCID<sub>50</sub> on MDCK cells. Results are reported as log<sub>10</sub>

566 TCID<sub>50</sub>/ml. Number in the black box indicates the average (n=3) percentage of lung

567 surface with visible pneumonic lesions at the 5dpi necropsy.

568

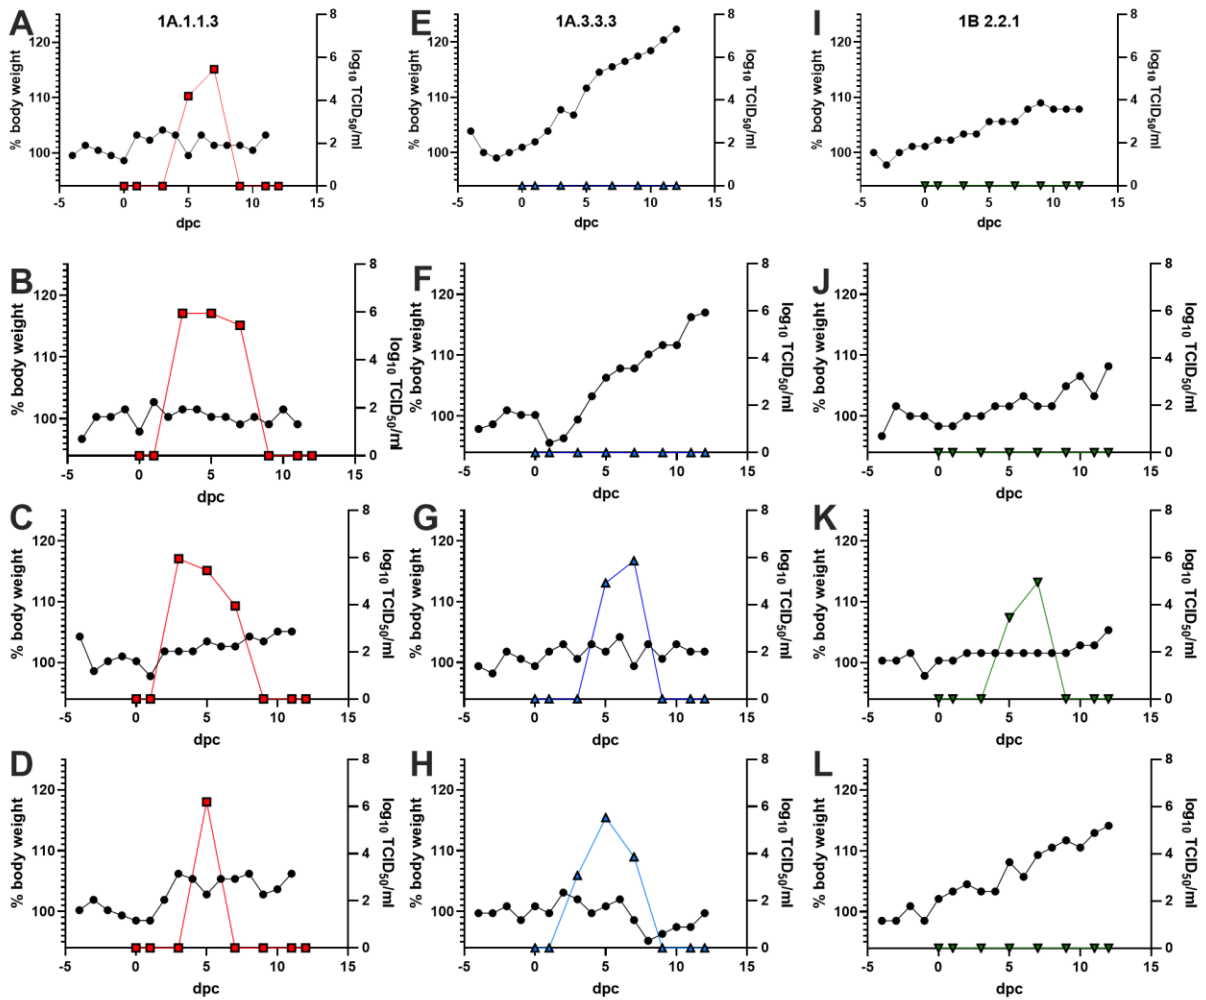

569

570 **Figure 3. Transmission and replication of swine viruses to ferrets.** Individual ferrets  
571 exposed to pigs infected with a 1A.1.1.3 (A-D, red squares), 1A.3.3.3 (E-H, blue up-  
572 triangles) or 1B.2.2.1 (I-L, green down-triangles) had body weights recorded daily and  
573 converted to a percentage of the 3-day average body weight prior to exposure (left axis,  
574 black circles). Nasal washes were measured for viral shedding by TCID<sub>50</sub> in MDCK cells  
575 and recorded as log<sub>10</sub> TCID<sub>50</sub>/ml (right axis, color square).
